# Supplementary material
Source: Research Square preprint supplement (doi:10.21203/rs.3.rs-9925123/v1)
Supplement: Supplementary file 1 [file 694a9b624e5c6e456aaf5c90.docx]

**Table 1 | Participant demographics and clinical characteristics.**

| **Characteristic** | **AD (n=13)** | **MCI (n=13)** | **NC (n=11)** | **p-value** |
| --- | --- | --- | --- | --- |
| Age (years) | 72.4 ± 6.8 | 70.1 ± 5.9 | 69.8 ± 6.2 | 0.312 |
| Sex (F/M) | 9/4 | 8/5 | 7/4 | 0.875 |
| Education (years) | 9.2 ± 3.8 | 10.5 ± 4.1 | 12.8 ± 3.5 | 0.041* |
| MMSE | 18.3 ± 3.7 | 25.6 ± 1.4 | 28.9 ± 0.8 | <0.001** |
| CDR-SB | 1.15 ± 0.4 | 0.5 ± 0.0 | 0.0 ± 0.0 | <0.001** |
| Epoch rejection (%) | 15.2 | 12.8 | 10.5 | 0.122 |
| SSQ score | 8.4 ± 5.2 | 7.1 ± 4.8 | 6.3 ± 4.1 | 0.421 |

Values: mean ± SD. p-values from one-way ANOVA or χ². *p<0.05; **p<0.001. SSQ = Simulator Sickness Questionnaire.

**Table 2 | Three-class classification performance across six ML models (37-fold LOOCV).**

| **Model** | **Accuracy (%)** | **F1-Macro** | **F1-Weighted** | **Prec-Macro** | **Recall-Macro** |
| --- | --- | --- | --- | --- | --- |
| **KNN (Optimal)** | **86.5** | **0.859** | **0.862** | **0.873** | **0.858** |
| RF | 83.8 | 0.837 | 0.838 | 0.837 | 0.837 |
| NN-GPU | 83.8 | 0.835 | 0.836 | 0.840 | 0.835 |
| LR | 78.4 | 0.775 | 0.780 | 0.782 | 0.776 |
| SVM | 75.7 | 0.745 | 0.751 | 0.758 | 0.746 |
| XGB | 73.0 | 0.726 | 0.727 | 0.733 | 0.730 |
| Null (permutation) | 34.2 ± 9.2 | — | — | — | — |

**Table 3 | Eleven candidate digital biomarkers: electrode, domain, band, effect size, and class specificity.**

| **Rank** | 1 | 2 | 3 | 4 | 5 | *6* | 7 | 8 | 9 | 10 | 11 | *| η² = Kruskal-Wallis effect size | p-values: Permutation test (n = 500) | LOOCV Sel = % folds feature was selected | RF Importance = mean Gini decrease | SHAP|φ| = mean absolute SHAP value (top features only) | ▲ Row highlighted in red = excluded after SHAP collinearity filter* |
| --- | --- | --- | --- | --- | --- | --- | --- | --- | --- | --- | --- | --- |
| **Feature** | gamma hub_score | alpha net_flow | gamma mean_PTE | beta net_flow | highbeta kurt | *delta net_flow* | delta hub_score | alpha/theta ratio | delta kurt | gamma mean_PTE | delta hub_score |
| **EGI Ch** | E41 | E33 | E30 | E24 | E1 | *E23* | E11 | E5 | E20 | E14 | E39 |
| **10-10 Equiv** | C5 | P5 | PO3 | PO8 | Fp2 | *P8* | FC6 | FC2 | P6 | T8 | CP1 |
| **Brain Region** | Left Lateral Central | Left Lateral Parietal | Left Medial Parieto-Occipital | Right Parieto-Occipital | Right Prefrontal | *Right Post. Temporal/Parietal* | Right Lateral Fronto-Central | Right Medial Fronto-Central | Right Lateral Parietal | Right Temporal | Left Medial Centro-Parietal |
| **Brodmann Area** | BA 1/2/3/4 | BA 39/40 | BA 19 | BA 19/39 | BA 10 | *BA 37/39* | BA 6/44 | BA 6 | BA 39/40 | BA 21/22 | BA 5/7 |
| **Brain Function** | Sensorimotor cortex, Tactile processing | Language, Calculation, Reading | Visual association, Visuospatial processing | Visual attention, Face/object processing | Executive function, Emotional regulation | *Face recognition, Object recognition* | Premotor cortex, Motor preparation | SMA, Motor planning | Spatial processing, Navigation | Auditory processing, Emotional prosody | Sensory integration, Body awareness |
| **Domain** | Graph Theory | PTE (Info) | PTE (Info) | PTE (Info) | Statistical | *PTE (Info)* | Graph Theory | Spectral-Ratio | Statistical | PTE (Info) | Graph Theory |
| **Band Label** | Gamma(30-45Hz) | Alpha(8-13Hz) | Gamma(30-45Hz) | Beta(13-30Hz) | HighBeta(22-30Hz) | *Delta(1-4Hz)* | Delta(1-4Hz) | BandRatio | Delta(1-4Hz) | Gamma(30-45Hz) | Delta(1-4Hz) |
| **Session Label** | Pre-Resting | During-VR | During-VR | During-VR | Post-Resting | *Pre-Resting* | Pre-Resting | During-VR | Pre-Resting | During-VR | Pre-Resting |
| **Metric** | hub_score | net_flow | mean_pte | net_flow | kurt | *net_flow* | hub_score | alpha_theta | kurt | mean_pte | hub_score |
| **p-value** | 2.21E-05 | 5.03E-04 | 3.59E-04 | 8.94E-03 | 2.29E-03 | *6.17E-04* | 1.12E-02 | 6.04E-03 | 1.51E-03 | 3.06E-03 | 2.12E-04 |
| **Effect Size (η²)** | 0.572 | 0.388 | 0.408 | 0.219 | 0.299 | *0.376* | 0.205 | 0.242 | 0.323 | 0.282 | 0.439 |
| **RF Importance** | 1.2 | 1.0 | 1.0 | 0.6 | 0.7 | *0.5* | 0.6 | 0.5 | 0.5 | 0.5 | 0.9 |
| **LOOCV Sel (%)** | 100.0 | 100.0 | 100.0 | 100 | 94.6 | *97.3* | 94.6 | 94.6 | 91.9 | 89.2 | 75.7 |
| **Confidence (%)** | 100 | 96.7 | 96.6 | 91.8 | 91.8 | *90.3* | 90.2 | 89 | 88 | 86.4 | 85.5 |
| **Category** | Info Theory | Info Theory | Info Theory | Info Theory | Statistical | *Info Theory* | Graph Theory | Ratio | Statistical | Info Theory | Graph Theory |
| **SHAP |φ|** | 0.066 | 0.051 | 0.044 | — | — | *—* | 0.034 | — | — | 0.043 | 0.043 |
| **Perm. p-value** | 2.21×10⁻¹⁰ | <0.002 | <0.002 | <0.002 | <0.002 | *<0.002* | <0.002 | 0.004 | 0.006 | 0.008 | 0.012 |

Notes: η²: Kruskal-Wallis effect size. Perm. p: permutation p-value (n=500). net_flow = PTE_out − PTE_in (positive=net driver; negative=net receiver). hub_score: betweenness centrality weighted by PTE strength.

**Table 4 | VR scene design and target cognitive domains.**

| **Scene** | **Environment** | **Duration** | **Target Cognitive Domain** |
| --- | --- | --- | --- |
| 1 | Urban high-speed descent | 0–60 s | Vestibulo-visual integration, spatial perception |
| 2 | Indoor domestic | 60–120 s | Semantic memory, object recognition |
| 3 | Natural (underwater/mountain) | 120–180 s | Emotional regulation, visual tracking |
| 4 | Desert/architectural | 180–240 s | Spatial encoding, novelty detection |
| 5 | Stadium (information overload) | 240–300 s | Selective attention, cognitive control |

**Table 5 | Multi-domain feature extraction summary.**

| **Domain** | **Key Descriptors** | ***N* Features** | **%** |
| --- | --- | --- | --- |
| Statistical | Power, mean, SD, skewness, kurtosis, RMS  (6 metrics × 64 ch × 7 bands × 3 sessions) | 8,064 | 47.7 |
| Information-theoretic | PTE hub score, net flow, mean PTE, directional asymmetry  (4 metrics × 64 ch × 7 bands × 3 sessions) | 5,376 | 31.8 |
| Dynamic | VR onset Δ (During − Pre), offset Δ (Post − During), overall Δ (Post − Pre), max change, recovery ratio  (5 metrics × 64 ch × 7 bands) | 2,240 | 13.3 |
| Ratio | α/θ, β/α, θ/β, high/low-β, slow/fast ratios  (5 metrics × 64 ch × 3 sessions) | 960 | 5.7 |
| Graph-theoretic | Small-worldness, clustering coefficient, eigenvector centrality, modularity, global/local efficiency, path length, assortativity, transitivity, rich club, betweenness, participation  (12 metrics × 3 sessions × 7 bands) | 252 | 1.5 |
| Total |  | 16,892 | 100 |
